# Supplementary material for: A KDM6A–KLF10 reinforcing feedback mechanism aggravates diabetic podocyte dysfunction
Source: PubMed Central journal article supplement (PMC6505577; doi:10.15252/emmm.201809828), 2019-04-04
Supplement: EMMM-11-e9828-s001.pdf [file EMMM-11-e9828-s001.pdf]

# APPENDIX

## A KDM6A–KLF10 REINFORCING FEEDBACK MECHANISM AGGRAVATES DIABETIC PODOCYTE DYSFUNCTION

### TABLE of CONTENTS

|                                                                                                                                                                        |    |
|------------------------------------------------------------------------------------------------------------------------------------------------------------------------|----|
| <b>Figure S1</b> –Analysis of the DNA methylation status at the nephrin gene promoter by methylation-specific PCR .....                                                | 4  |
| <b>Figure S2</b> –Association of changes in the expression levels of KDM6A and nephrin in kidney with the development of proteinuria in STZ-treated diabetic mice..... | 6  |
| <b>Figure S3</b> –In vivo analysis of diabetic mice treated with a KDM6A inhibitor GSK-J4.....                                                                         | 7  |
| <b>Figure S4</b> –Genotyping and expression of KDM6A in KDM6A-KO mice .....                                                                                            | 8  |
| <b>Table S1</b> –Exact P values for Figure 1.....                                                                                                                      | 9  |
| <b>Table S2</b> –Exact P values for Figure 2.....                                                                                                                      | 10 |
| <b>Table S3</b> –Exact P values for Figure 3.....                                                                                                                      | 12 |
| <b>Table S4</b> –Exact P values for Figure 4.....                                                                                                                      | 14 |
| <b>Table S5</b> –Exact P values for Figure 5.....                                                                                                                      | 16 |
| <b>Table S6</b> –Exact P values for Figure 6.....                                                                                                                      | 19 |
| <b>Table S7</b> –Exact P values for Figure 7.....                                                                                                                      | 21 |
| <b>Table S8</b> –Exact P values for Figure EV1.....                                                                                                                    | 22 |
| <b>Table S9</b> –Exact P values for Figure EV3.....                                                                                                                    | 23 |
| <b>Table S10</b> –Exact P values for Figure EV4.....                                                                                                                   | 24 |
| <b>Table S11</b> –Exact P values for Figure EV5.....                                                                                                                   | 26 |
| <b>Table S12</b> –Baseline characteristics of control subjects and patients with diabetic nephropathy.....                                                             | 28 |

# A

## MethPrimer result

(mouse nephrin gene promoter: 2000 bp)

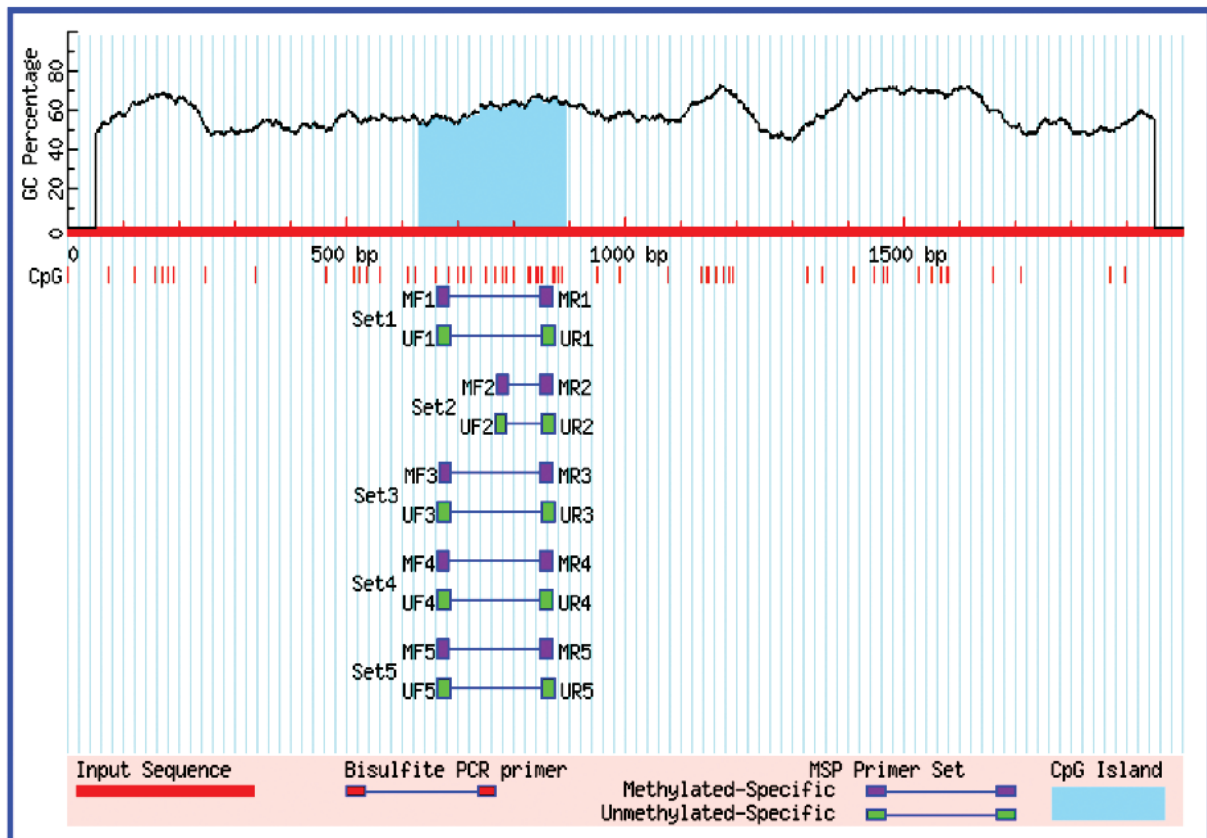



**Appendix Figure S1 – Analysis of the DNA methylation status at the nephrin gene promoter by methylation-specific PCR.**

- A** CpG island prediction results. A 2000-bp nephrin promoter region (NC\_000073.6; Mouse strain C57BL/6J chromosome 7, GRCm38.p4) was used in CpG island prediction by MethPrimer (<http://www.urogene.org/methprimer>). A CpG island was found within the promoter region from nt 633 to 895. The criteria used for defining CpG island include the DNA length >100 bp, GC percent > 50.0, and observed/expected CpG ratio > 0.6.
- B** Primer picking results for methylation-specific PCR. Primer sets of PCR-based methylation analysis were designed following bisulfite conversion of DNA template.
- C** DNA sequence of the selected nephrin gene promoter region and localization of specific primer sets (U3 and M3) used in the methylation-specific PCR experiments. The unmethylated-specific primers (U3) include 5'-GGTTGGAAGATTTTATGTTTTTGA and 5'-CAAACAACCTACCCTAAACATCCATA, whereas the methylated-specific primers (M3) include 5'-GTTGGAAGATTTTATGTTTTTCGA and 5'-GAACAACCTACCCTAAACATCCGTA.
- D** Representative methylation-specific PCR analysis of the nephrin gene promoter using U3- and M3-specific primer sets. After bisulfite conversion of genomic DNAs from immortalized podocytes cultured in normal (5 mM) or high glucose (30 mM), PCR amplification was performed using U3 or M3 primer sets. Presented experiments were performed at least three times independently.

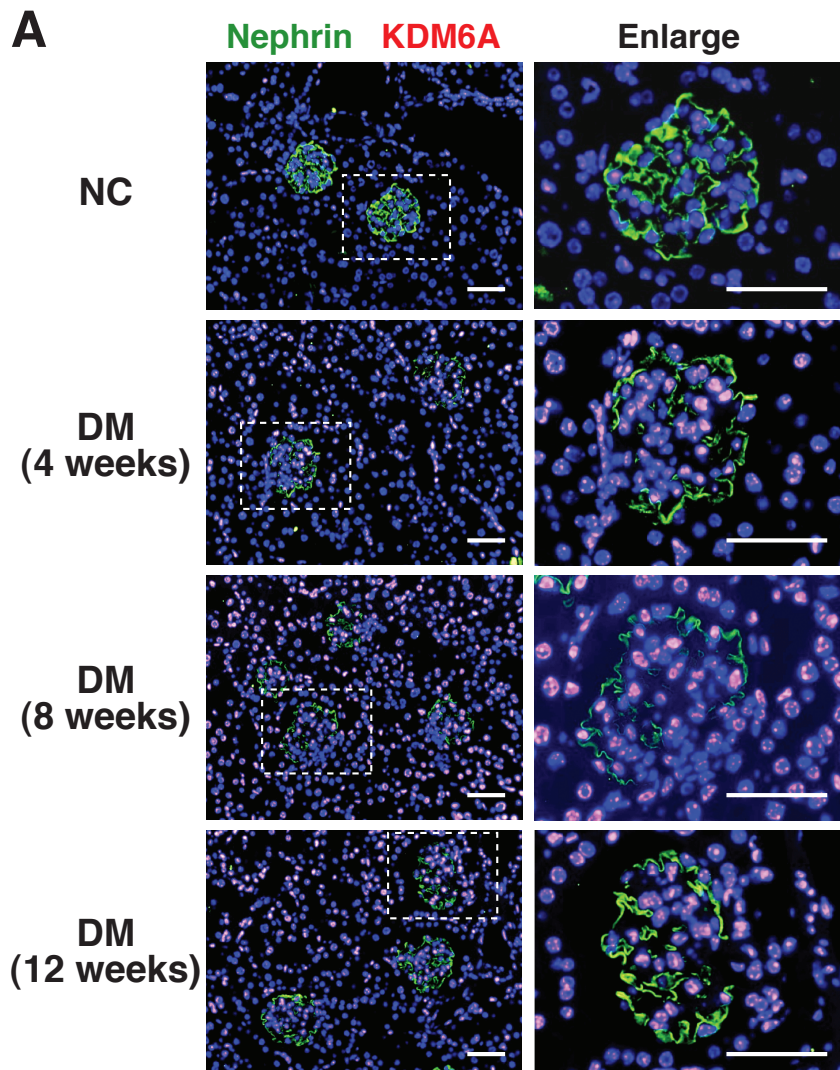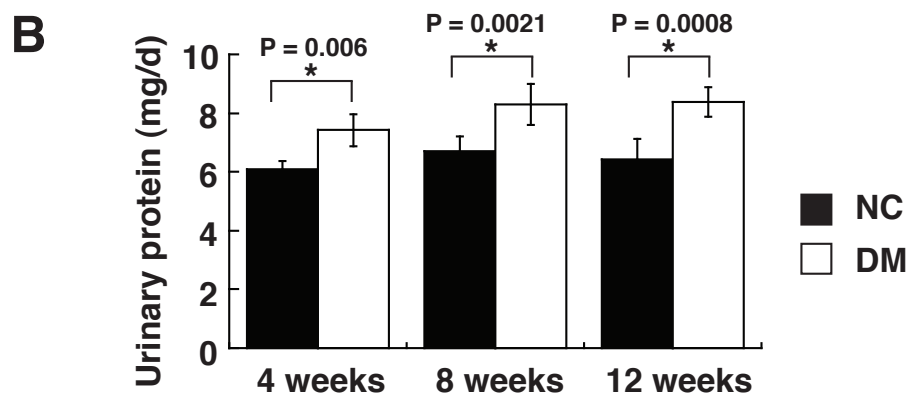

**Appendix Figure S2 – Association of changes in the expression levels of KDM6A and nephrin in kidney with the development of proteinuria in STZ-treated diabetic mice.**

**A** Double immunofluorescence staining of mouse kidney sections with nephrin (green) and KDM6A (red). Kidney samples from normal mice and the 4-, 8-, and 12-week diabetic mice were included in the experiment. Right panels are enlarged views of the areas enclosed with dashed boxes shown in left panels. Scale bars, 50  $\mu$ m. Compared to control kidney sections, both decreased nephrin expression and increased KDM6A expression were substantially observed in kidney sections of the 4-, 8-, and 12-week diabetic mice. Experiments were repeated at least twice.

**B** Levels of urinary protein excretion in normal and diabetic mice. Urinary total protein excretion was measured at 4, 8 and 12 weeks after diabetic induction.  $*P < 0.05$  versus normal controls (Wilcoxon two-sample test;  $n = 8$ ).

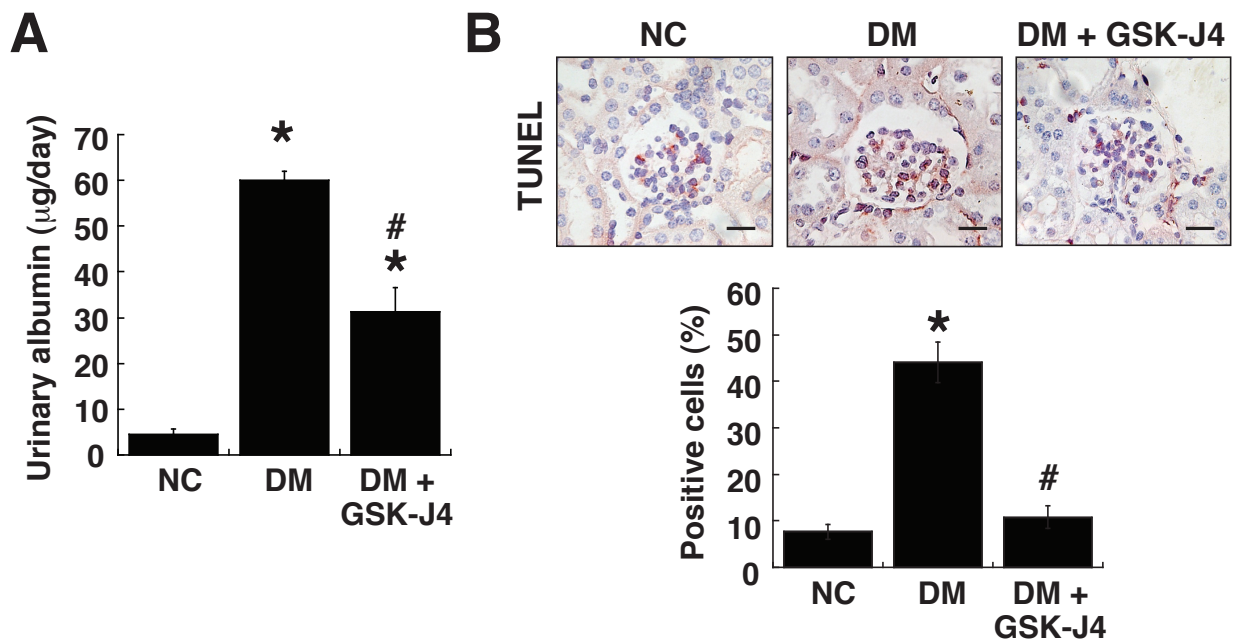

**Appendix Figure S3 – *In vivo* analysis of diabetic mice treated with a KDM6A inhibitor GSK-J4.**

- A** Urinary albumin excretion in normal, diabetic and GSK-J4-treated diabetic mice. Urinary albumin levels were measured with a turbidimetric immunoassay (Autokit Micro Albumin, Wako, Osaka, Japan) at 12 weeks after diabetic induction. \* $P < 0.05$  versus normal controls, # $P < 0.05$  versus untreated diabetic mice (Parametric ANOVA and a Bonferroni *post hoc* test;  $n = 8$ ).
- B** Detection of glomerular cell apoptosis in normal, diabetic and GSK-J4-treated diabetic mice. TUNEL assay for apoptosis was performed using an assay kit according to the manufacturer's instruction (#TAAP01D, BioTnA Biotech., Kaohsiung Taiwan). Scale bars, 20 µm. \* $P < 0.05$  versus normal controls, # $P < 0.05$  versus untreated diabetic mice (Parametric ANOVA and a Bonferroni *post hoc* test;  $n = 3$ ).

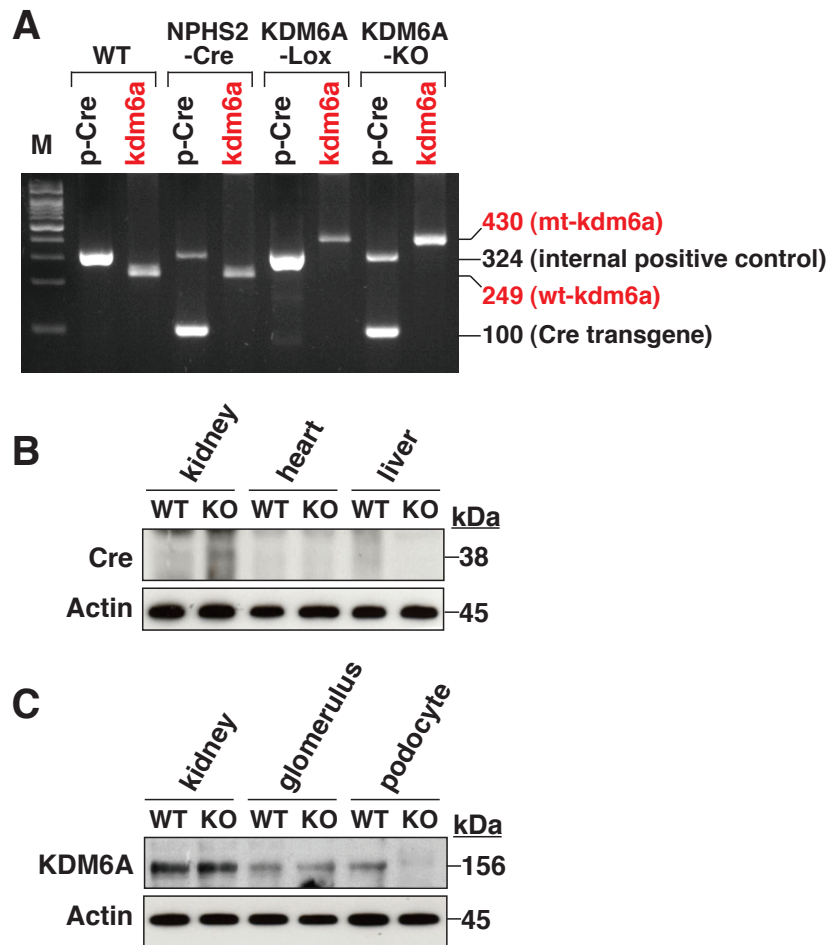

**Appendix Figure S4 – Genotyping and expression of *KDM6A* in *KDM6A*-KO mice.**

**A** Genotyping of podocyte-specific *KDM6A* knockout mice. Genomic DNAs were extracted from tail tissues of wild-type, transgenic Podocin-Cre [129S6.Cg-Tg(NPHS2-cre)259Lbh/BroJ], *KDM6*<sup>fllox</sup> (129S-Kdm6a<sup>tm1.1Kaig</sup>) and *KDM6A*-KO mice. The presence of the *Cre* transgene was identified as a 100-bp fragment in PCR reaction, whereas the presence of the floxed *KDM6A* allele was identified as a 430-bp PCR fragment.

**B** Specific expression of Cre recombinase in kidney tissues of *KDM6A*-KO mice.

**C** Expression profiles of *KDM6A* in kidneys, glomeruli and podocytes isolated from wild-type and *KDM6A*-KO mice.



**Table S1: Exact *P* values for Figure 1**

| <b>Figure Panels</b>             | <b><i>P</i> value</b> | <b>Significance</b> | <b>Mark</b> |
|----------------------------------|-----------------------|---------------------|-------------|
| <b>1A_ Nephtrin levels</b>       |                       |                     |             |
| HG vs. NC (24 hr)                | <i>P</i> =0.0132      | Yes                 | *           |
| HG vs. NC (48 hr)                | <i>P</i> =0.0061      | Yes                 | *           |
| HG vs. NC (72 hr)                | <i>P</i> =0.0038      | Yes                 | *           |
| <b>1C_ Nephtrin levels</b>       |                       |                     |             |
| HG vs. NC                        | <i>P</i> =0.0182      | Yes                 | *           |
| HG (KDM-i) vs. HG                | <i>P</i> =0.0061      | Yes                 | #           |
| <b>1E_ Levels of KDM mRNAs</b>   |                       |                     |             |
| HG vs. NC (KDM3A)                | <i>P</i> =0.1281      | No                  |             |
| HG vs. NC (KDM4A)                | <i>P</i> =0.4631      | No                  |             |
| HG vs. NC (KDM5A)                | <i>P</i> =0.3645      | No                  |             |
| HG vs. NC (KDM5B)                | <i>P</i> =0.2364      | No                  |             |
| HG vs. NC (KDM6A)                | <i>P</i> =0.0043      | Yes                 | *           |
| HG vs. NC (KDM6B)                | <i>P</i> =0.46235     | No                  |             |
| <b>1F_ KDM6A levels</b>          |                       |                     |             |
| HG vs. NC (24 hr)                | <i>P</i> =0.0236      | Yes                 | *           |
| HG vs. NC (48 hr)                | <i>P</i> =0.0092      | Yes                 | *           |
| HG vs. NC (72 hr)                | <i>P</i> =0.0077      | Yes                 | *           |
| <b>1G_ Histone modifications</b> |                       |                     |             |
| HG vs. NC (H3K27me1)             | <i>P</i> =0.7231      | No                  |             |
| HG vs. NC (H3K27me2)             | <i>P</i> =0.0182      | Yes                 | *           |
| HG vs. NC (H3K27me3)             | <i>P</i> =0.0082      | Yes                 | *           |
| HG vs. NC (meH3K9)               | <i>P</i> =0.3817      | No                  |             |

**Table S2: Exact *P* values for Figure 2**

| <b>Figure Panels</b>            | <b><i>P</i> value</b> | <b>Significance</b> | <b>Mark</b> |
|---------------------------------|-----------------------|---------------------|-------------|
| <b>2A_ KDM6A knockdown</b>      |                       |                     |             |
| HG (siCtrl) vs. NC              |                       |                     |             |
| KDM6A levels                    | <i>P</i> =0.0136      | Yes                 | *           |
| Nephrin levels                  | <i>P</i> =0.0127      | Yes                 | *           |
| WT-1 levels                     | <i>P</i> =0.0093      | Yes                 | *           |
| HG (siKDM6A) vs. NC             |                       |                     |             |
| KDM6A levels                    | <i>P</i> =0.0213      | Yes                 | *           |
| Nephrin levels                  | <i>P</i> =0.4873      | No                  |             |
| WT-1 levels                     | <i>P</i> =0.5162      | No                  |             |
| Mann (siKDM6A) vs. NC           |                       |                     |             |
| KDM6A levels                    | <i>P</i> =0.0134      | Yes                 | *           |
| Nephrin levels                  | <i>P</i> =0.6473      | No                  |             |
| WT-1 levels                     | <i>P</i> =0.7432      | No                  |             |
| HG (siKDM6A) vs. HG (siCtrl)    |                       |                     |             |
| KDM6A levels                    | <i>P</i> =0.0028      | Yes                 | #           |
| Nephrin levels                  | <i>P</i> =0.0076      | Yes                 | #           |
| WT-1 levels                     | <i>P</i> =0.0085      | Yes                 | #           |
| <b>2B_ KDM6A overexpression</b> |                       |                     |             |
| HG vs. NC                       |                       |                     |             |
| KDM6A levels                    | <i>P</i> =0.0146      | Yes                 | *           |
| Nephrin levels                  | <i>P</i> =0.0086      | Yes                 | *           |
| WT-1 levels                     | <i>P</i> =0.0136      | Yes                 | *           |
| KDM6A vs. Vector                |                       |                     |             |
| KDM6A levels                    | <i>P</i> =0.0008      | Yes                 | *           |
| Nephrin levels                  | <i>P</i> =0.0027      | Yes                 | *           |
| WT-1 levels                     | <i>P</i> =0.0039      | Yes                 | *           |

**Table S2: Exact *P* values for Figure 2\_(Continued)**

| <b>Figure Panels</b>           | <b><i>P</i> value</b> | <b>Significance</b> | <b>Mark</b> |
|--------------------------------|-----------------------|---------------------|-------------|
| <b>2C_ H3K27me3 levels</b>     |                       |                     |             |
| HG (siCtrl) vs. NC             | <i>P</i> =0.0149      | Yes                 | *           |
| HG (siKDM) vs. HG (siCtrl)     | <i>P</i> =0.0161      | Yes                 | #           |
| KDM6A vs. Vector               | <i>P</i> =0.0073      | Yes                 | *           |
| <b>2E_ GSK-J4 treatment</b>    |                       |                     |             |
| HG vs. NC                      |                       |                     |             |
| Nephrin levels                 | <i>P</i> =0.0083      | Yes                 | *           |
| WT-1 levels                    | <i>P</i> =0.0115      | Yes                 | *           |
| H3K27me3 levels                | <i>P</i> =0.0166      | Yes                 | *           |
| HG (GSK-J4) vs. HG (untreated) |                       |                     |             |
| Nephrin levels                 | <i>P</i> =0.0058      | Yes                 | #           |
| WT-1 levels                    | <i>P</i> =0.0097      | Yes                 | #           |
| H3K27me3 levels                | <i>P</i> =0.0146      | Yes                 | #           |

**Table S3: Exact *P* values for Figure 3**

| <b>Figure Panels</b>                     | <b><i>P</i> value</b> | <b>Significance</b> | <b>Mark</b> |
|------------------------------------------|-----------------------|---------------------|-------------|
| <b>3A_STZ treatment (mRNA levels)</b>    |                       |                     |             |
| DM vs. NC (KDM6A; 4 weeks)               | <i>P</i> =0.0136      | Yes                 | *           |
| DM vs. NC (KDM6A; 8 weeks)               | <i>P</i> =0.0032      | Yes                 | *           |
| DM vs. NC (KDM6A; 12 weeks)              | <i>P</i> =0.0006      | Yes                 | *           |
| DM vs. NC (Nephrin; 4 weeks)             | <i>P</i> =0.0122      | Yes                 | *           |
| DM vs. NC (Nephrin; 8 weeks)             | <i>P</i> =0.0035      | Yes                 | *           |
| DM vs. NC (Nephrin; 12 weeks)            | <i>P</i> =0.0043      | Yes                 | *           |
| DM vs. NC (WT-1; 4 weeks)                | <i>P</i> =0.0055      | Yes                 | *           |
| DM vs. NC (WT-1; 8 weeks)                | <i>P</i> =0.0071      | Yes                 | *           |
| DM vs. NC (WT-1; 12 weeks)               | <i>P</i> =0.0016      | Yes                 | *           |
| <b>3B_STZ treatment (protein levels)</b> |                       |                     |             |
| DM vs. NC (Nephrin; 4 weeks)             | <i>P</i> =0.0132      | Yes                 | *           |
| DM vs. NC (Nephrin; 8 weeks)             | <i>P</i> =0.0067      | Yes                 | *           |
| DM vs. NC (Nephrin; 12 weeks)            | <i>P</i> =0.0036      | Yes                 | *           |
| DM vs. NC (KDM6A; 4 weeks)               | <i>P</i> =0.0174      | Yes                 | *           |
| DM vs. NC (KDM6A; 8 weeks)               | <i>P</i> =0.0064      | Yes                 | *           |
| DM vs. NC (KDM6A; 12 weeks)              | <i>P</i> =0.0087      | Yes                 | *           |
| DM vs. NC (H3K27me3; 4 weeks)            | <i>P</i> =0.0436      | Yes                 | *           |
| DM vs. NC (H3K27me3; 8 weeks)            | <i>P</i> =0.0126      | Yes                 | *           |
| DM vs. NC (H3K27me3; 12 weeks)           | <i>P</i> =0.0116      | Yes                 | *           |
| <b>3D_Biochemical tests</b>              |                       |                     |             |
| Urinary protein levels                   |                       |                     |             |
| DM vs. NC                                | <i>P</i> =0.0009      | Yes                 | *           |
| DM (GSK-J4) vs. DM                       | <i>P</i> =0.0045      | Yes                 | #           |
| Kidney weight (%)                        |                       |                     |             |
| DM vs. NC                                | <i>P</i> =0.0127      | Yes                 | *           |
| DM (GSK-J4) vs. DM                       | <i>P</i> =0.0248      | Yes                 | #           |
| HbA1c (%)                                |                       |                     |             |
| DM vs. NC                                | <i>P</i> =0.0082      | Yes                 | *           |
| DM (GSK-J4) vs. NC                       | <i>P</i> =0.0096      | Yes                 | *           |
| DM (GKS-J4) vs. DM                       | <i>P</i> =0.1044      | No                  |             |

**Table S3: Exact *P* values for Figure 3\_(Continued)**

| <b>Figure Panels</b>             | <b><i>P</i> value</b> | <b>Significance</b> | <b>Mark</b> |
|----------------------------------|-----------------------|---------------------|-------------|
| <b>3E_ WB (GSK-J4 treatment)</b> |                       |                     |             |
| DM vs. NC                        |                       |                     |             |
| KDM6A levels                     | <i>P</i> =0.0071      | Yes                 | *           |
| Nephrin levels                   | <i>P</i> =0.0101      | Yes                 | *           |
| WT-1 levels                      | <i>P</i> =0.0127      | Yes                 | *           |
| H3K27me3 levels                  | <i>P</i> =0.0143      | Yes                 | *           |
| DM (GSK-J4) vs. DM               |                       |                     |             |
| KDM6A levels                     | <i>P</i> =0.0098      | Yes                 | #           |
| Nephrin levels                   | <i>P</i> =0.0241      | Yes                 | #           |
| WT-1 levels                      | <i>P</i> =0.0149      | Yes                 | #           |
| H3K27me3 levels                  | <i>P</i> =0.0169      | Yes                 | #           |
| <b>3F_ IFA (Glomeruli)</b>       |                       |                     |             |
| DM vs. NC                        |                       |                     |             |
| KDM6A levels                     | <i>P</i> =0.0057      | Yes                 | *           |
| Nephrin levels                   | <i>P</i> =0.0036      | Yes                 | *           |
| WT-1 levels                      | <i>P</i> =0.0145      | Yes                 | *           |
| DM (GSK-J4) vs. DM               |                       |                     |             |
| KDM6A levels                     | <i>P</i> =0.0161      | Yes                 | #           |
| Nephrin levels                   | <i>P</i> =0.0058      | Yes                 | #           |
| WT-1 levels                      | <i>P</i> =0.0121      | Yes                 | #           |

**Table S4: Exact *P* values for Figure 4**

| <b>Figure Panels</b>               | <b><i>P</i> value</b> | <b>Significance</b> | <b>Mark</b> |
|------------------------------------|-----------------------|---------------------|-------------|
| <b>4A_ KDM6A mRNA levels</b>       |                       |                     |             |
| KDM6A-KO vs. WT                    | <i>P</i> =0.0082      | Yes                 | *           |
| <b>4D_ Biochemical tests</b>       |                       |                     |             |
| Urinary protein levels             |                       |                     |             |
| WT-DN vs. WT-NC                    | <i>P</i> =0.0092      | Yes                 | *           |
| KO-NC vs. WT-NC                    | <i>P</i> =0.7361      | No                  |             |
| KO-DM vs. WT-NC                    | <i>P</i> =0.0382      | Yes                 | *           |
| KO-DM vs. WT-DM                    | <i>P</i> =0.0082      | Yes                 | #           |
| Kidney weight (%)                  |                       |                     |             |
| WT-DN vs. WT-NC                    | <i>P</i> =0.0142      | Yes                 | *           |
| KO-NC vs. WT-NC                    | <i>P</i> =0.5362      | No                  |             |
| KO-DM vs. WT-NC                    | <i>P</i> =0.4732      | No                  |             |
| KO-DM vs. WT-DM                    | <i>P</i> =0.0172      | Yes                 | #           |
| HbA1c (%)                          |                       |                     |             |
| WT-DM vs. WT-NC                    | <i>P</i> =0.0048      | Yes                 | *           |
| KO-NC vs. WT-NC                    | <i>P</i> =0.6361      | No                  |             |
| KO-DM vs. WT-NC                    | <i>P</i> =0.0067      | Yes                 | *           |
| KO-DM vs. WT-DM                    | <i>P</i> =0.6143      | No                  |             |
| <b>4E_ IFA (Nephrin levels)</b>    |                       |                     |             |
| WT-DM vs. WT-NC                    | <i>P</i> =0.0042      | Yes                 | *           |
| KO-DM vs. WT-DM                    | <i>P</i> =0.0141      | Yes                 | #           |
| <b>4F_ IFA (H3K27me3 levels)</b>   |                       |                     |             |
| WT-DM vs. WT-NC                    | <i>P</i> =0.0136      | Yes                 | *           |
| KO-DM vs. WT-DM                    | <i>P</i> =0.0202      | Yes                 | #           |
| <b>4H_ WB (KDM6A-KO podocytes)</b> |                       |                     |             |
| Nephrin levels                     |                       |                     |             |
| WT-DM vs. WT-NC                    | <i>P</i> =0.0073      | Yes                 | *           |
| KO-DM vs. WT-DM                    | <i>P</i> =0.0148      | Yes                 | #           |
| WT-1 levels                        |                       |                     |             |
| WT-DM vs. WT-NC                    | <i>P</i> =0.0113      | Yes                 | *           |
| KO-DM vs. WT-DM                    | <i>P</i> =0.0209      | Yes                 | #           |

**Table S4: Exact *P* values for Figure 4\_(Continued)**

| <b>Figure Panels</b>        | <b><i>P</i> value</b> | <b>Significance</b> | <b>Mark</b> |
|-----------------------------|-----------------------|---------------------|-------------|
| <b>4I_WB (HG treatment)</b> |                       |                     |             |
| HG vs. NC                   |                       |                     |             |
| Nephrin levels              | <i>P</i> =0.0152      | Yes                 | *           |
| WT-1 levels                 | <i>P</i> =0.0201      | Yes                 | *           |
| Podocin levels              | <i>P</i> =0.0172      | Yes                 | *           |
| Snail levels                | <i>P</i> =0.7010      | No                  |             |
| KO (HG) vs. WT (HG)         |                       |                     |             |
| Nephrin levels              | <i>P</i> =0.0225      | Yes                 | #           |
| WT-1 levels                 | <i>P</i> =0.0138      | Yes                 | #           |
| Podocin levels              | <i>P</i> =0.0147      | Yes                 | #           |
| Snail levels                | <i>P</i> =0.6486      | No                  |             |

**Table S5: Exact *P* values for Figure 5**

| <b>Figure Panels</b>              | <b><i>P</i> value</b> | <b>Significance</b> | <b>Mark</b> |
|-----------------------------------|-----------------------|---------------------|-------------|
| <b>5B_ WB (lentivirus-KDM6A)</b>  |                       |                     |             |
| KDM6A vs. Ctrl                    |                       |                     |             |
| KDM6A levels                      | <i>P</i> =0.0076      | Yes                 | *           |
| Nephrin levels                    | <i>P</i> =0.0133      | Yes                 | *           |
| KLF10 levels                      | <i>P</i> =0.0156      | Yes                 | *           |
| Snail levels                      | <i>P</i> =0.7210      | No                  |             |
| <b>5C_ WB (HG treatment)</b>      |                       |                     |             |
| HG vs. NC                         |                       |                     |             |
| KDM6A levels                      | <i>P</i> =0.0133      | Yes                 | *           |
| KLF10 levels                      | <i>P</i> =0.0076      | Yes                 | *           |
| Nephrin levels                    | <i>P</i> =0.0058      | Yes                 | *           |
| <b>5D_ WB (KLF10 knockdown)</b>   |                       |                     |             |
| KDM6A levels                      |                       |                     |             |
| HG vs. NC                         | <i>P</i> =0.0216      | Yes                 | *           |
| HG (siCtrl) vs. NC                | <i>P</i> =0.0178      | Yes                 | *           |
| HG (siKLF10) vs. HG (siCtrl)      | <i>P</i> =0.0173      | Yes                 | #           |
| KLF10 levels                      |                       |                     |             |
| HG vs. NC                         | <i>P</i> =0.0183      | Yes                 | *           |
| HG (siCtrl) vs. NC                | <i>P</i> =0.0168      | Yes                 | *           |
| HG (siKLF10) vs. HG (siCtrl)      | <i>P</i> =0.0173      | Yes                 | #           |
| Nephrin levels                    |                       |                     |             |
| HG vs. NC                         | <i>P</i> =0.0079      | Yes                 | *           |
| HG (siCtrl) vs. NC                | <i>P</i> =0.0276      | Yes                 | *           |
| HG (siKLF10) vs. HG (siCtrl)      | <i>P</i> =0.0218      | Yes                 | #           |
| <b>5E_ IFA (GSK-J4 treatment)</b> |                       |                     |             |
| DM vs. NC                         |                       |                     |             |
| KLF10 levels                      | <i>P</i> =0.0069      | Yes                 | *           |
| Nephrin levels                    | <i>P</i> =0.0133      | Yes                 | *           |
| DM (GSK-J4) vs. DM                |                       |                     |             |
| KLF10 levels                      | <i>P</i> =0.0101      | Yes                 | *           |
| Nephrin levels                    | <i>P</i> =0.0216      | Yes                 | *           |



**Table S5: Exact *P* values for Figure 5\_(Continued)**

| Figure Panels                    | <i>P</i> value   | Significance | Mark |
|----------------------------------|------------------|--------------|------|
| <b>5F_ IFA (KDM6A-KO mice)</b>   |                  |              |      |
| KLF10 levels                     |                  |              |      |
| WT-DM vs. WT-NC                  | <i>P</i> =0.0116 | Yes          | *    |
| KO-DM vs. WT-DM                  | <i>P</i> =0.0179 | Yes          | #    |
| Nephrin levels                   |                  |              |      |
| WT-DM vs. WT-NC                  | <i>P</i> =0.0073 | Yes          | *    |
| KO-DM vs. WT-DM                  | <i>P</i> =0.0102 | Yes          | *    |
| <b>5G_ WB (GSK-J4 treatment)</b> |                  |              |      |
| DM vs. NC                        |                  |              |      |
| KDM6A levels                     | <i>P</i> =0.0071 | Yes          | *    |
| KLF10 levels                     | <i>P</i> =0.0080 | Yes          | *    |
| Nephrin levels                   | <i>P</i> =0.0127 | Yes          | *    |
| DM (GSK-J4) vs. DM               |                  |              |      |
| KDM6A levels                     | <i>P</i> =0.0125 | Yes          | #    |
| KLF10 levels                     | <i>P</i> =0.0083 | Yes          | #    |
| Nephrin levels                   | <i>P</i> =0.0172 | Yes          | #    |
| <b>5H_ WB (KDM6A-KO mice)</b>    |                  |              |      |
| KLF10 levels                     |                  |              |      |
| WT-DM vs. WT-NC                  | <i>P</i> =0.0128 | Yes          | *    |
| KO-DM vs. WT-DM                  | <i>P</i> =0.0161 | Yes          | #    |
| Nephrin levels                   |                  |              |      |
| WT-DM vs. WT-NC                  | <i>P</i> =0.0045 | Yes          | *    |
| KO-DM vs. WT-DM                  | <i>P</i> =0.0116 | Yes          | #    |
| <b>5I_ ChIP assay</b>            |                  |              |      |
| HG vs. NC (-2052/-1753 region)   |                  |              |      |
| Anti-KLF10                       | <i>P</i> =0.0086 | Yes          | *    |
| Anti-acetyl-H4                   | <i>P</i> =0.0145 | Yes          | *    |
| Anti-Dnmt1                       | <i>P</i> =0.0043 | Yes          | *    |
| Anti-Dnmt3                       | <i>P</i> =0.5281 | No           |      |

**Table S5: Exact *P* values for Figure 5\_(Continued)**

| <b>Figure Panels</b>                | <b><i>P</i> value</b> | <b>Significance</b> | <b>Mark</b> |
|-------------------------------------|-----------------------|---------------------|-------------|
| <b>5I_ChIP assay</b>                |                       |                     |             |
| HG vs. NC (-1802/-1553 region)      |                       |                     |             |
| Anti-KLF10                          | <i>P</i> =0.0106      | Yes                 | *           |
| Anti-acetyl-H4                      | <i>P</i> =0.0258      | Yes                 | *           |
| Anti-Dnmt1                          | <i>P</i> =0.0047      | Yes                 | *           |
| Anti-Dnmt3                          | <i>P</i> =0.6781      | No                  |             |
| <b>5J_WB (KLF10 overexpression)</b> |                       |                     |             |
| KLF10 vs. vector                    |                       |                     |             |
| KLF10 levels                        | <i>P</i> =0.0094      | Yes                 | *           |
| KDM6A levels                        | <i>P</i> =0.0231      | Yes                 | *           |
| Nephrin levels                      | <i>P</i> =0.0118      | Yes                 | *           |
| WT-1 levels                         | <i>P</i> =0.0136      | Yes                 | *           |
| Podocin levels                      | <i>P</i> =0.0316      | Yes                 | *           |
| Synaptopodin                        | <i>P</i> =0.0146      | Yes                 | *           |

**Table S6: Exact *P* values for Figure 6**

| <b>Figure Panels</b>         | <b><i>P</i> value</b> | <b>Significance</b> | <b>Mark</b> |
|------------------------------|-----------------------|---------------------|-------------|
| <b>6A_KLF10 mRNA levels</b>  |                       |                     |             |
| KLF10-KO vs. WT              | <i>P</i> =0.00003     | Yes                 | **          |
| <b>6D_Biochemical tests</b>  |                       |                     |             |
| Urinary protein levels       |                       |                     |             |
| WT-DN vs. WT-NC              | <i>P</i> =0.0085      | Yes                 | *           |
| KO-NC vs. WT-NC              | <i>P</i> =0.8112      | No                  |             |
| KO-DM vs. WT-NC              | <i>P</i> =0.0412      | Yes                 | *           |
| KO-DM vs. WT-DM              | <i>P</i> =0.0154      | Yes                 | #           |
| Kidney weight (%)            |                       |                     |             |
| WT-DN vs. WT-NC              | <i>P</i> =0.0216      | Yes                 | *           |
| KO-NC vs. WT-NC              | <i>P</i> =0.7261      | No                  |             |
| KO-DM vs. WT-NC              | <i>P</i> =0.4732      | No                  |             |
| KO-DM vs. WT-DM              | <i>P</i> =0.0313      | Yes                 | #           |
| HbA1c (%)                    |                       |                     |             |
| WT-DM vs. WT-NC              | <i>P</i> =0.0079      | Yes                 | *           |
| KO-NC vs. WT-NC              | <i>P</i> =0.5363      | No                  |             |
| KO-DM vs. WT-NC              | <i>P</i> =0.0107      | Yes                 | *           |
| KO-DM vs. WT-DM              | <i>P</i> =0.6477      | No                  |             |
| <b>6E_IFA (Nephrin)</b>      |                       |                     |             |
| WT-DM vs. WT-NC              | <i>P</i> =0.0041      | Yes                 | *           |
| KO-DM vs. WT-DM              | <i>P</i> =0.0073      | Yes                 | #           |
| <b>6F_IFA (KDM6A)</b>        |                       |                     |             |
| WT-DM vs. WT-NC              | <i>P</i> =0.0086      | Yes                 | *           |
| KO-DM vs. WT-DM              | <i>P</i> =0.0093      | Yes                 | #           |
| <b>6I_WB (KLF10-KO mice)</b> |                       |                     |             |
| KDM6A levels                 |                       |                     |             |
| WT-DM vs. WT-NC              | <i>P</i> =0.0086      | Yes                 | *           |
| KO-DM vs. WT-DM              | <i>P</i> =0.0114      | Yes                 | #           |
| Nephrin levels               |                       |                     |             |
| WT-DM vs. WT-NC              | <i>P</i> =0.0113      | Yes                 | *           |
| KO-DM vs. WT-DM              | <i>P</i> =0.0210      | Yes                 | #           |

**Table S6: Exact *P* values for Figure 6\_(Continued)**

| <b>Figure Panels</b>                 | <b><i>P</i> value</b> | <b>Significance</b> | <b>Mark</b> |
|--------------------------------------|-----------------------|---------------------|-------------|
| <b>6I_WB (KLF10-KO mice)</b>         |                       |                     |             |
| WT-1 levels                          |                       |                     |             |
| WT-DM vs. WT-NC                      | <i>P</i> =0.0229      | Yes                 | *           |
| KO-DM vs. WT-DM                      | <i>P</i> =0.0208      | Yes                 | #           |
| <b>6J_WB (TGF-β1/siKLF10)</b>        |                       |                     |             |
| TGF-β1 vs. NC                        |                       |                     |             |
| KLF10 levels                         | <i>P</i> =0.0208      | Yes                 | *           |
| KDM6A levels                         | <i>P</i> =0.0139      | Yes                 | *           |
| Nephrin                              | <i>P</i> =0.0116      | Yes                 | *           |
| WT-1                                 | <i>P</i> =0.0093      | Yes                 | *           |
| TGF-β1 (siCtrl) vs. NC               |                       |                     |             |
| KLF10 levels                         | <i>P</i> =0.0221      | Yes                 | *           |
| KDM6A levels                         | <i>P</i> =0.0322      | Yes                 | *           |
| Nephrin                              | <i>P</i> =0.0177      | Yes                 | *           |
| WT-1                                 | <i>P</i> =0.0218      | Yes                 | *           |
| TGF-β1 (siKLF10) vs. TGF-β1 (siCtrl) |                       |                     |             |
| KLF10 levels                         | <i>P</i> =0.0163      | Yes                 | #           |
| KDM6A levels                         | <i>P</i> =0.0225      | Yes                 | #           |
| Nephrin                              | <i>P</i> =0.0124      | Yes                 | #           |
| WT-1                                 | <i>P</i> =0.0109      | Yes                 | #           |

**Table S7: Exact *P* values for Figure 7**

| <b>Figure Panels</b>                    | <b><i>P</i> value</b> | <b>Significance</b> | <b>Mark</b> |
|-----------------------------------------|-----------------------|---------------------|-------------|
| <b>7A_ IFA (human)</b>                  |                       |                     |             |
| DN vs. Ctrl (KDM6A)                     | <i>P</i> =0.0131      | Yes                 | *           |
| DN vs. Ctrl (KLF10)                     | <i>P</i> =0.0136      | Yes                 | *           |
| DN vs. Ctrl (Nephrin)                   | <i>P</i> =0.0281      | Yes                 | *           |
| DM vs. Ctrl (WT-1)                      | <i>P</i> =0.0372      | Yes                 | *           |
| <b>7B_ WB (human)</b>                   |                       |                     |             |
| DN vs. Ctrl (KDM6A)                     | <i>P</i> =0.0139      | Yes                 | *           |
| DN vs. Ctrl (KLF10)                     | <i>P</i> =0.0152      | Yes                 | *           |
| DN vs. Ctrl (Nephrin)                   | <i>P</i> =0.0121      | Yes                 | *           |
| DM vs. Ctrl (WT-1)                      | <i>P</i> =0.0162      | Yes                 | *           |
| <b>7C_ Exosomal mRNA levels (human)</b> |                       |                     |             |
| DN vs. Ctrl (KDM6A)                     | <i>P</i> =0.0006      | Yes                 | ***         |
| DN vs. Ctrl (KLF10)                     | <i>P</i> =0.0014      | Yes                 | **          |
| DN vs. Ctrl (Nephrin)                   | <i>P</i> =0.0255      | Yes                 | *           |

**Table S8: Exact *P* values for Figure EV1**

| <b>Figure Panels</b>                 | <b><i>P</i> value</b> | <b>Significance</b> | <b>Mark</b> |
|--------------------------------------|-----------------------|---------------------|-------------|
| <b>EV1A_ Urinary albumin levels</b>  |                       |                     |             |
| WT-DM vs. WT-NC                      | <i>P</i> =0.0008      | Yes                 | *           |
| KO-DM vs. WT-NC                      | <i>P</i> =0.0128      | Yes                 | *           |
| KO-DM vs. WT-DM                      | <i>P</i> =0.0216      | Yes                 | #           |
| <b>EV1B_ Systolic blood pressure</b> |                       |                     |             |
| WT-DM vs. WT-NC                      | <i>P</i> =0.2618      | No                  |             |
| KO-DM vs. WT-NC                      | <i>P</i> =0.4328      | No                  |             |
| KO-DM vs. WT-DM                      | <i>P</i> =0.3821      | No                  |             |
| <b>EV1C_ Cystatin C levels</b>       |                       |                     |             |
| WT-DM vs. WT-NC                      | <i>P</i> =0.4681      | No                  |             |
| KO-DM vs. WT-NC                      | <i>P</i> =0.4364      | No                  |             |
| KO-DM vs. WT-DM                      | <i>P</i> =0.6721      | No                  |             |
| <b>EV1D_ Tunnel assay</b>            |                       |                     |             |
| WT-DM vs. WT-NC                      | <i>P</i> =0.0103      | Yes                 | *           |
| KO-DM vs. WT-NC                      | <i>P</i> =0.3125      | No                  |             |
| KO-DM vs. WT-DM                      | <i>P</i> =0.0216      | Yes                 | #           |
| <b>EV1E_ GBM thickness</b>           |                       |                     |             |
| WT-DM vs. WT-NC                      | <i>P</i> =0.0098      | Yes                 | *           |
| KO-DM vs. WT-NC                      | <i>P</i> =0.1123      | No                  |             |
| KO-DM vs. WT-DM                      | <i>P</i> =0.0316      | Yes                 | #           |
| <b>EV1F_ PAS staining</b>            |                       |                     |             |
| Glomeruli                            |                       |                     |             |
| WT-DM vs. WT-NC                      | <i>P</i> =0.0102      | Yes                 | *           |
| KO-DM vs. WT-NC                      | <i>P</i> =0.1281      | No                  |             |
| KO-DM vs. WT-DM                      | <i>P</i> =0.0162      | Yes                 | #           |
| Tubules                              |                       |                     |             |
| WT-DM vs. WT-NC                      | <i>P</i> =0.0068      | Yes                 | *           |
| KO-DM vs. WT-NC                      | <i>P</i> =0.0105      | Yes                 | *           |
| KO-DM vs. WT-DM                      | <i>P</i> =0.5211      | No                  |             |

**Table S9: Exact *P* values for Figure EV3**

| <b>Figure Panels</b>                 | <b><i>P</i> value</b> | <b>Significance</b> | <b>Mark</b> |
|--------------------------------------|-----------------------|---------------------|-------------|
| <b>EV3A_ Urinary albumin levels</b>  |                       |                     |             |
| WT-DM vs. WT-NC                      | <i>P</i> =0.0029      | Yes                 | *           |
| KO-DM vs. WT-NC                      | <i>P</i> =0.0132      | Yes                 | *           |
| KO-DM vs. WT-DM                      | <i>P</i> =0.0331      | Yes                 | #           |
| <b>EV3B_ Systolic blood pressure</b> |                       |                     |             |
| WT-DM vs. WT-NC                      | <i>P</i> =0.3642      | No                  |             |
| KO-DM vs. WT-NC                      | <i>P</i> =0.6728      | No                  |             |
| KO-DM vs. WT-DM                      | <i>P</i> =0.5536      | No                  |             |
| <b>EV3C_ Cystatin C levels</b>       |                       |                     |             |
| WT-DM vs. WT-NC                      | <i>P</i> =0.7368      | No                  |             |
| KO-DM vs. WT-NC                      | <i>P</i> =0.3447      | No                  |             |
| KO-DM vs. WT-DM                      | <i>P</i> =0.8231      | No                  |             |
| <b>EV3D_ Tunnel assay</b>            |                       |                     |             |
| WT-DM vs. WT-NC                      | <i>P</i> =0.0088      | Yes                 | *           |
| KO-DM vs. WT-NC                      | <i>P</i> =0.4755      | No                  |             |
| KO-DM vs. WT-DM                      | <i>P</i> =0.0115      | Yes                 | #           |
| <b>EV3E_ GBM thickness</b>           |                       |                     |             |
| WT-DM vs. WT-NC                      | <i>P</i> =0.0198      | Yes                 | *           |
| KO-DM vs. WT-NC                      | <i>P</i> =0.3123      | No                  |             |
| KO-DM vs. WT-DM                      | <i>P</i> =0.0233      | Yes                 | #           |
| <b>EV3F_ PAS staining</b>            |                       |                     |             |
| Glomeruli                            |                       |                     |             |
| WT-DM vs. WT-NC                      | <i>P</i> =0.0135      | Yes                 | *           |
| KO-DM vs. WT-NC                      | <i>P</i> =0.1891      | No                  |             |
| KO-DM vs. WT-DM                      | <i>P</i> =0.0144      | Yes                 | #           |
| Tubules                              |                       |                     |             |
| WT-DM vs. WT-NC                      | <i>P</i> =0.0068      | Yes                 | *           |
| KO-DM vs. WT-NC                      | <i>P</i> =0.3310      | No                  |             |
| KO-DM vs. WT-DM                      | <i>P</i> =0.0116      | Yes                 | #           |

**Table S10: Exact *P* values for Figure EV4**

| <b>Figure Panels</b>               | <b><i>P</i> value</b> | <b>Significance</b> | <b>Mark</b> |
|------------------------------------|-----------------------|---------------------|-------------|
| <b>EV4A_WB</b>                     |                       |                     |             |
| KDM6A vs. Vector                   |                       |                     |             |
| KDM6A levels                       | <i>P</i> =0.0063      | Yes                 | *           |
| KLF10 levels                       | <i>P</i> =0.0016      | Yes                 | *           |
| Nephrin levels                     | <i>P</i> =0.0132      | Yes                 | *           |
| WT-1 levels                        | <i>P</i> =0.0094      | Yes                 | *           |
| KDM6A (siCtrl) vs. Vector          |                       |                     |             |
| KDM6A levels                       | <i>P</i> =0.0092      | Yes                 | *           |
| KLF10 levels                       | <i>P</i> =0.0102      | Yes                 | *           |
| Nephrin levels                     | <i>P</i> =0.0163      | Yes                 | *           |
| WT-1 levels                        | <i>P</i> =0.0048      | Yes                 | *           |
| KDM6A (siKLF10) vs. Vector         |                       |                     |             |
| KDM6A levels                       | <i>P</i> =0.0058      | Yes                 | *           |
| KLF10 levels                       | <i>P</i> =0.7202      | No                  |             |
| Nephrin levels                     | <i>P</i> =0.3673      | No                  |             |
| WT-1 levels                        | <i>P</i> =0.4807      | No                  |             |
| KDM6A (siKLF10) vs. KDM6A (siCtrl) |                       |                     |             |
| KDM6A levels                       | <i>P</i> =0.7322      | No                  |             |
| KLF10 levels                       | <i>P</i> =0.0153      | Yes                 | #           |
| Nephrin levels                     | <i>P</i> =0.0214      | Yes                 | #           |
| WT-1 levels                        | <i>P</i> =0.0109      | Yes                 | #           |
| <b>EV4B_WB</b>                     |                       |                     |             |
| KLF10 vs. Vector                   |                       |                     |             |
| KDM6A levels                       | <i>P</i> =0.0188      | Yes                 | *           |
| KLF10 levels                       | <i>P</i> =0.0076      | Yes                 | *           |
| Nephrin levels                     | <i>P</i> =0.0107      | Yes                 | *           |
| WT-1 levels                        | <i>P</i> =0.0097      | Yes                 | *           |



**Table S10: Exact *P* values for Figure EV4\_(Continued)**

| <b>Figure Panels</b>               | <b><i>P</i> value</b> | <b>Significance</b> | <b>Mark</b> |
|------------------------------------|-----------------------|---------------------|-------------|
| <b>EV4B_WB</b>                     |                       |                     |             |
| KLF10 (siCtrl) vs. Vector          |                       |                     |             |
| KDM6A levels                       | <i>P</i> =0.0103      | Yes                 | *           |
| KLF10 levels                       | <i>P</i> =0.0082      | Yes                 | *           |
| Nephrin levels                     | <i>P</i> =0.0163      | Yes                 | *           |
| WT-1 levels                        | <i>P</i> =0.0148      | Yes                 | *           |
| KLF10 (siKDM6A) vs. Vector         |                       |                     |             |
| KDM6A levels                       | <i>P</i> =0.4603      | No                  |             |
| KLF10 levels                       | <i>P</i> =0.0124      | Yes                 | *           |
| Nephrin levels                     | <i>P</i> =0.0106      | Yes                 | *           |
| WT-1 levels                        | <i>P</i> =0.0098      | Yes                 | *           |
| KLF10 (siKDM6A) vs. KLF10 (siCtrl) |                       |                     |             |
| KDM6A levels                       | <i>P</i> =0.0133      | Yes                 | #           |
| KLF10 levels                       | <i>P</i> =0.3536      | No                  |             |
| Nephrin levels                     | <i>P</i> =0.4351      | No                  |             |
| WT-1 levels                        | <i>P</i> =0.7739      | No                  |             |

**Table S11: Exact *P* values for Figure EV5**

| <b>Figure Panels</b>                     | <b><i>P</i> value</b> | <b>Significance</b> | <b>Mark</b> |
|------------------------------------------|-----------------------|---------------------|-------------|
| <b>EV5A_WB</b>                           |                       |                     |             |
| HG vs. NC                                |                       |                     |             |
| KDM6A levels                             | <i>P</i> =0.0067      | Yes                 | *           |
| KLF10 levels                             | <i>P</i> =0.0102      | Yes                 | *           |
| Nephrin levels                           | <i>P</i> =0.0086      | Yes                 | *           |
| WT-1 levels                              | <i>P</i> =0.0043      | Yes                 | *           |
| HG (anti-TGF-β1 Ab) vs. HG               |                       |                     |             |
| KDM6A levels                             | <i>P</i> =0.0096      | Yes                 | #           |
| KLF10 levels                             | <i>P</i> =0.0066      | Yes                 | #           |
| Nephrin levels                           | <i>P</i> =0.0112      | Yes                 | #           |
| WT-1 levels                              | <i>P</i> =0.0065      | Yes                 | #           |
| <b>EV5B_WB</b>                           |                       |                     |             |
| KDM6A vs. Vector                         |                       |                     |             |
| KDM6A levels                             | <i>P</i> =0.0028      | Yes                 | *           |
| KLF10 levels                             | <i>P</i> =0.0078      | Yes                 | *           |
| Nephrin levels                           | <i>P</i> =0.0062      | Yes                 | *           |
| WT-1 levels                              | <i>P</i> =0.0047      | Yes                 | *           |
| KDM6A (TGF-β1 Ab) vs. Vector (TGF-β1 Ab) |                       |                     |             |
| KDM6A levels                             | <i>P</i> =0.0087      | Yes                 | *           |
| KLF10 levels                             | <i>P</i> =0.0069      | Yes                 | *           |
| Nephrin levels                           | <i>P</i> =0.0058      | Yes                 | *           |
| WT-1 levels                              | <i>P</i> =0.0033      | Yes                 | *           |
| KDM6A (TGF-β1 Ab) vs. KDM6A (untreated)  |                       |                     |             |
| KDM6A levels                             | <i>P</i> =0.5437      | No                  |             |
| KLF10 levels                             | <i>P</i> =0.6691      | No                  |             |
| Nephrin levels                           | <i>P</i> =0.7826      | No                  |             |
| WT-1 levels                              | <i>P</i> =0.4387      | No                  |             |

**Table S11: Exact *P* values for Figure EV5\_(Continued)**

| <b>Figure Panels</b>                     | <b><i>P</i> value</b> | <b>Significance</b> | <b>Mark</b> |
|------------------------------------------|-----------------------|---------------------|-------------|
| <b>EV5C_WB</b>                           |                       |                     |             |
| KLF10 vs. Vector                         |                       |                     |             |
| KDM6A levels                             | <i>P</i> =0.0096      | Yes                 | *           |
| KLF10 levels                             | <i>P</i> =0.0027      | Yes                 | *           |
| Nephrin levels                           | <i>P</i> =0.0066      | Yes                 | *           |
| WT-1 levels                              | <i>P</i> =0.0082      | Yes                 | *           |
| KLF10 (TGF-β1 Ab) vs. Vector (TGF-β1 Ab) |                       |                     |             |
| KDM6A levels                             | <i>P</i> =0.0099      | Yes                 | *           |
| KLF10 levels                             | <i>P</i> =0.0043      | Yes                 | *           |
| Nephrin levels                           | <i>P</i> =0.0106      | Yes                 | *           |
| WT-1 levels                              | <i>P</i> =0.0093      | Yes                 | *           |
| KLF10 (TGF-β1 Ab) vs. KLF10 (untreated)  |                       |                     |             |
| KDM6A levels                             | <i>P</i> =0.7685      | No                  |             |
| KLF10 levels                             | <i>P</i> =0.5521      | No                  |             |
| Nephrin levels                           | <i>P</i> =0.6587      | No                  |             |
| WT-1 levels                              | <i>P</i> =0.4372      | No                  |             |

**Table S12. Baseline characteristics of control subjects and patients with diabetic nephropathy**

|                                   | Control<br>(N = 12) | DM<br>(N = 12)  |
|-----------------------------------|---------------------|-----------------|
| Age (years)                       | 46.4 ± 4.8          | 69.0 ± 8.2      |
| Sex (male/female)                 | 4/8                 | 7/5             |
| Diabetes types                    | –                   | type II         |
| eGFR (ml/min/1.73m <sup>2</sup> ) | 90.1 ± 9.2          | 27.3 ± 17.9     |
| TPCR (mg/g)*                      | 65.5 ± 20.3         | 3260.1 ± 3370.1 |
| HbA1c (%)                         | –                   | 7.5 ± 1.7       |
| Use of RAS blockers               | 0/12                | 10/12           |
| Use of SGLT2 inhibitors           | 0/12                | 0/12            |
| CVD <sup>#</sup>                  | 0/12                | 4/12            |
| CAD <sup>&amp;</sup>              | 0/12                | 4/12            |

\*TPCR: Total urine protein-to-creatinine ratio

<sup>#</sup>CVD: Cardiovascular disease

<sup>&</sup>CAD: Coronary artery disease
